# Supplementary material for: Predicting anisotropic thermal displacements for hydrogens from solid-state NMR: a study on hydrogen bonding in polymorphs of palmitic acid
Source: Royal Society of Chemistry journal article supplement (doi:10.1039/c7cp06724k), 2018-01-01
Supplement: c7cp06724k1.pdf [file c7cp06724k1.pdf]

A TensorView illustration of COOH hydrogens in Phase C.

The COOH hydrogen anisotropic displacement parameters for phase C are illustrated below. This plot provides a direct comparison with the hydrogen ordered phases illustrated in Figure 6 of the main manuscript.

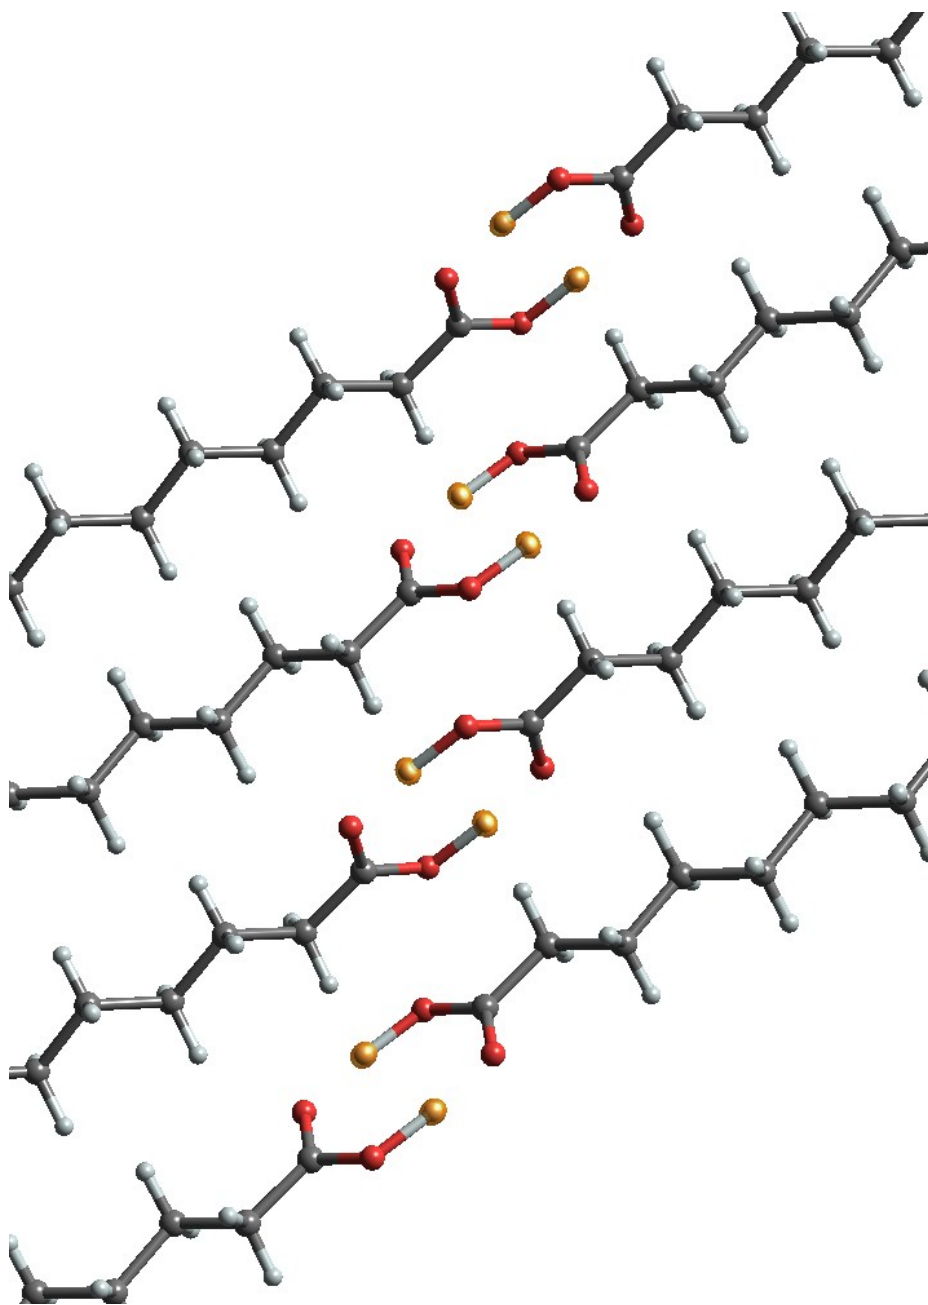

Figure 1. A TensorView illustration of palmitic acid phase C showing COOH hydrogen anisotropic displacement ellipsoids.
